# Supplementary material for: Geographically Diverse Clusters of Nontoxigenic Corynebacterium diphtheriae Infection, Germany, 2016–2017
Source: PubMed Central journal article supplement (PMC6038752; doi:10.3201/eid2407.172026), 2018-07
Supplement: 17-2026-Techapp-s1.pdf [file 17-2026-Techapp-s1.pdf]

# Geographically Diverse Clusters of Nontoxigenic *Corynebacterium diphtheriae* Infection, Germany, 2016–2017

## Technical Appendix

**Technical Appendix Table.** Non-toxigenic *C. diphtheriae* isolates from Northern Germany accumulations, selected for NGS analysis\*

| Sample ID | Receipt Date | Isolation Source | Disease                           | City        | Age | Sex    | Biovar   | Sequence type | Risk factors/Travel history                                                         |
|-----------|--------------|------------------|-----------------------------------|-------------|-----|--------|----------|---------------|-------------------------------------------------------------------------------------|
| KL0330    | 05.04.2012   | Leg              | Wound infection                   | Hamburg     | 62  | Male   | Mitis    | 130           | Homeless                                                                            |
| KL0355    | 04.07.2012   | Foot             | Wound infection                   | Hamburg     | 29  | Male   | Mitis    | 494           | NA                                                                                  |
| KL0360    | 18.07.2012   | Skin             | Wound infection                   | Hamburg     | 73  | Male   | Mitis    | 297           | Africa                                                                              |
| KL0371    | 20.09.2012   | Back             | Wound infection                   | Hamburg     | 38  | Male   | Mitis    | 130           | NA                                                                                  |
| KL0372    | 02.10.2012   | Head             | Wound infection                   | Hamburg     | 47  | Male   | Mitis    | 130           | Mixed infection ( <i>S. Aureus</i> , <i>Enterobacter sp.</i> , <i>Pantoea sp.</i> ) |
| KL0377    | 30.10.2012   | Skin             | Wound infection                   | Hamburg     | 23  | Male   | Gravis   | 123           | NA                                                                                  |
| KL0434    | 25.07.2013   | Skin             | Wound infection, insect bite      | Bremerhaven | 4   | Male   | Mitis    | 259           | Travel activity, destination not reported                                           |
| KL0438    | 13.08.2013   | Skin             | Wound infection                   | Hamburg     | 48  | Female | Mitis    | 130           | NA                                                                                  |
| KL0461    | 23.10.2013   | Hand             | Wound infection                   | Hamburg     | 18  | Male   | Mitis    | 495           | NA                                                                                  |
| KL0476    | 10.12.2013   | Foot             | Wound infection                   | Hamburg     | 68  | Male   | Gravis   | 295           | Travel activity, destination not reported                                           |
| KL0479    | 12.12.2013   | Skin             | Wound infection                   | Bremerhaven | 53  | Male   | Belfanti | 501           | Hepatitis C                                                                         |
| KL0507    | 09.04.2014   | Blood            | Sepsis                            | Hamburg     | 46  | Male   | Mitis    | 130           | NA                                                                                  |
| KL0522    | 14.05.2014   | Foot, leg        | Wound infection                   | Hamburg     | 29  | Male   | Mitis    | 439           | Drug abuse, mixed infection ( <i>S. Pyogenes</i> , <i>S. Aureus</i> )               |
| KL0557    | 09.09.2014   | Leg              | Wound infection                   | Hamburg     | 35  | Female | Gravis   | 497           | Sri Lanka, mixed infection ( <i>S. Pyogenes</i> )                                   |
| KL0585    | 23.01.2015   | Leg              | Wound infection                   | Berlin      | 35  | Male   | Gravis   | 8             | NA                                                                                  |
| KL0599    | 30.03.2015   | Leg              | Wound infection, abscess          | Berlin      | 45  | Male   | Mitis    | 8             | Homeless                                                                            |
| KL0628    | 12.06.2015   | Tonsils          | Tonsillitis                       | Berlin      | 29  | Male   | Mitis    | 8             | NA                                                                                  |
| KL0637    | 30.06.2015   | NA               | NA                                | Hamburg     | 66  | Male   | Mitis    | 498           | NA                                                                                  |
| KL0649    | 10.07.2015   | Leg              | Wound infection                   | Leverkusen  | 35  | Female | Gravis   | 8             | Origin: Belgium                                                                     |
| KL0659    | 05.08.2015   | Foot             | Wound infection                   | Berlin      | 63  | Male   | Gravis   | 8             | Ketoacidotic coma                                                                   |
| KL0660    | 06.08.2015   | Foot             | Wound infection                   | Hamburg     | 71  | Male   | Mitis    | 130           | NA                                                                                  |
| KL0675    | 02.09.2015   | Arm              | Wound infection, sepsis, phlegmon | Berlin      | NA  | Male   | Gravis   | 8             | Homeless                                                                            |
| KL0676    | 04.09.2015   | Skin             | Wound infection                   | Hamburg     | 51  | Male   | Mitis    | 439           | NA                                                                                  |
| KL0678    | 08.09.2015   | Foot             | Wound infection                   | Berlin      | 58  | Male   | Mitis    | 8             | Homeless, Alcohol abuse                                                             |
| KL0691    | 09.10.2015   | Finger           | Wound infection                   | Berlin      | 42  | Male   | Gravis   | 8             | Homeless                                                                            |
| KL0693    | 13.10.2015   | Blood            | Sepsis, pneumonia                 | Bochum      | 53  | Male   | Gravis   | 8             | Origin: Poland                                                                      |
| KL0698    | 26.10.2015   | Knee             | Wound infection                   | Berlin      | 62  | Male   | Mitis    | 8             | NA                                                                                  |
| KL0705    | 23.11.2015   | Skin             | Wound infection, ulcer            | Berlin      | 82  | Male   | Gravis   | 8             | NA                                                                                  |
| KL0713    | 17.12.2015   | Hand             | Wound infection                   | Berlin      | 38  | Male   | Gravis   | 8             | NA                                                                                  |

| Sample ID | Receipt Date | Isolation Source | Disease                                    | City        | Age | Sex    | Biovar | Sequence type | Risk factors/ Travel history                            |
|-----------|--------------|------------------|--------------------------------------------|-------------|-----|--------|--------|---------------|---------------------------------------------------------|
| KL0747    | 20.01.2016   | Elbow            | Wound infection                            | Trier       | 45  | Male   | Mitis  | 8             | Homeless, Drug abuse                                    |
| KL0759    | 08.02.2016   | Elbow            | Olecranon bursitis                         | Berlin      | 31  | Male   | Gravis | 8             | Homeless                                                |
| KL0762    | 02.03.2016   | Throat           | Pharyngitis, tonsillitis                   | Hamburg     | 33  | Male   | Mitis  | 446           | NA                                                      |
| KL0768    | 10.03.2016   | Blood            | Sepsis, endocarditis                       | Bremen      | 56  | Male   | Gravis | 8             | Homeless                                                |
| KL0770    | 16.03.2016   | Leg              | Wound infection, ulcer                     | Berlin      | 51  | Male   | Gravis | 8             | NA                                                      |
| KL0788    | 08.04.2016   | Hand             | Wound infection, phlegmon, post human bite | Berlin      | 37  | Male   | Gravis | 8             | Homeless, Origin: Poland                                |
| KL0798    | 10.05.2016   | Skin             | Wound infection, burn                      | Hanover     | 39  | Male   | Gravis | 8             | Homeless                                                |
| KL0811    | 25.05.2016   | Leg              | Wound infection                            | Berlin      | 40  | Male   | Gravis | 8             | Homeless, alcohol abuse, origin: Poland                 |
| KL0812    | 27.05.2016   | Arm              | Wound infection, abscess                   | Berlin      | 20  | Male   | Gravis | 8             | NA                                                      |
| KL0813    | 30.05.2016   | NA               | Carrier                                    | Leverkusen  | 36  | Female | Mitis  | 8             | NA                                                      |
| KL0816    | 02.06.2016   | Leg              | Wound infection                            | Bremerhaven | 54  | Male   | Mitis  | 499           | NA                                                      |
| KL0823    | 28.06.2016   | Wound            | Wound infection, scratch                   | Hamburg     | 30  | Male   | Gravis | 8             | Homeless, Alcohol abuse                                 |
| KL0833    | 08.08.2016   | Blood            | Sepsis (initial finding: wound infection)  | Hanover     | 57  | Male   | Gravis | 8             | Homeless                                                |
| KL0834    | 18.08.2016   | Foot             | Wound infection                            | Leverkusen  | 56  | Female | Gravis | 8             | Drug abuse                                              |
| KL0844    | 28.09.2016   | Skin             | Wound infection                            | Kiel        | 48  | Male   | Gravis | 8             | NA                                                      |
| KL0845    | 29.09.2016   | Sub facial       | Wound infection                            | Berlin      | 31  | Female | Gravis | 8             | NA                                                      |
| KL0847    | 30.09.2016   | Thumb            | Wound infection                            | Hamburg     | 43  | Male   | Gravis | 8             | NA                                                      |
| KL0848    | 07.10.2016   | Punctate         | Abcess peritonsillar                       | Berlin      | 45  | Male   | Gravis | 8             | Origin: Russia                                          |
| KL0854    | 26.10.2016   | Hand             | Wound infection, tissue                    | Hamburg     | 36  | Male   | Gravis | 8             | Origin: Nepal                                           |
| KL0858    | 08.11.2016   | Hand             | Wound infection                            | Hamburg     | 40  | Male   | Gravis | 8             | NA                                                      |
| KL0865    | 12.12.2016   | Hand             | Wound infection                            | Leverkusen  | 38  | Female | Gravis | 8             | NA                                                      |
| KL0871    | 28.12.2016   | Hand             | Wound infection                            | Hamburg     | 42  | Female | Gravis | 8             | Mixed infection ( <i>S. Pyogenes</i> ), Origin: Hungary |
| KL0872    | 30.12.2016   | Ear              | Wound infection, post human bite           | Hamburg     | 57  | Male   | Gravis | 8             | Homeless, Alcohol abuse                                 |
| KL0875    | 05.01.2017   | Foot             | Wound infection                            | Hamburg     | 26  | Male   | Gravis | 441           | Sri Lanka, doctor                                       |
| KL0881    | 13.01.2017   | Blood            | Sepsis (initial finding: wound infection)  | Berlin      | 51  | Male   | Gravis | 8             | Homeless, Alcohol abuse, origin: Croatia                |
| KL0888    | 16.01.2017   | Ankle            | Wound infection, ulcer                     | Hamburg     | 75  | Male   | Mitis  | 389           | Mixed infection ( <i>S. Pyogenes</i> , <i>E. Coli</i> ) |
| KL0891    | 18.01.2017   | Leg              | Wound infection                            | Hamburg     | 19  | Male   | Gravis | 8             | Homeless, drug abuse                                    |
| KL0895    | 23.01.2017   | Foot             | Wound infection                            | Hamburg     | 63  | Male   | Gravis | 295           | Sri Lanka, mixed infection (MRSA)                       |
| KL0899    | 30.01.2017   | Skin             | Wound infection                            | Leverkusen  | 31  | Male   | Gravis | 8             | NA                                                      |
| KL0920    | 14.03.2017   | Hip              | Wound infection                            | Schwerin    | 30  | Male   | Mitis  | 294           | Origin: Eritrea                                         |
| KL0929    | 11.04.2017   | Knee             | Wound infection                            | Essen       | 44  | Male   | Gravis | 8             | Homeless                                                |
| KL0932    | 13.04.2017   | Finger           | Wound infection, ulcer                     | Schwerin    | 53  | Female | Gravis | 130           | Homeless                                                |
| KL0933    | 19.04.2017   | Shoulder         | Wound infection                            | Essen       | 56  | Female | Gravis | 8             | Homeless                                                |
| KL0935    | 11.05.2017   | Knee             | Wound infection, arthritis                 | Hamburg     | 37  | Female | Gravis | 8             | Homeless, mixed infection (MRSA)                        |
| KL0936    | 15.05.2017   | Penis            | Wound infection, ulcer                     | Berlin      | 67  | Male   | Gravis | 441           | India                                                   |

| Sample ID | Receipt Date | Isolation Source | Disease                                         | City       | Age | Sex    | Biovar | Sequence type | Risk factors/ Travel history |
|-----------|--------------|------------------|-------------------------------------------------|------------|-----|--------|--------|---------------|------------------------------|
| KL0937    | 15.05.2017   | Thigh            | Wound infection, deep wound after amputation    | Berlin     | 46  | Male   | Mitis  | 130           | NA                           |
| KL0939    | 18.05.2017   | Leg              | Wound infection                                 | Berlin     | 40  | Male   | Mitis  | 130           | NA                           |
| KL0940    | 19.05.2017   | Skin             | Wound infection, ulcer                          | Hamburg    | 65  | Male   | Mitis  | 507           | NA                           |
| KL0943    | 29.05.2017   | NA               | NA                                              | Hamburg    | 49  | Male   | Mitis  | 130           | NA                           |
| KL0945    | 30.05.2017   | Blood            | Endocarditis, aortic valve abcess               | Hanover    | 39  | Male   | Gravis | 8             | Origin: Poland               |
| KL0947    | 31.05.2017   | Arm              | Wound infection, abscess                        | Hamburg    | 36  | Male   | Mitis  | 439           | Origin: Turkey               |
| KL0952    | 19.06.2017   | Skin             | Wound infection, ulcer                          | Berlin     | 40  | Male   | Gravis | 508           | NA                           |
| KL0953    | 19.06.2017   | Leg              | Wound infection                                 | Hamburg    | 52  | Female | Gravis | 8             | Homeless                     |
| KL0954    | 23.06.2017   | Blood            | Bacteraemia                                     | Berlin     | 76  | Male   | Mitis  | 439           | Homeless, drug abuse         |
| KL0961    | 04.07.2017   | Foot             | Wound infection                                 | Leverkusen | 54  | Male   | Gravis | 509           | Origin: Sri Lanka            |
| KL0964    | 06.07.2017   | Blood            | Bacteraemia, (initial finding: wound infection) | Berlin     | 48  | Male   | Mitis  | 439           | Homeless                     |
| KL0965    | 12.07.2017   | Skin             | Wound infection                                 | Dortmund   | 52  | Female | Gravis | 295           | Sri Lanka                    |

\*Epidemiologic data included as available (NA = no information available).

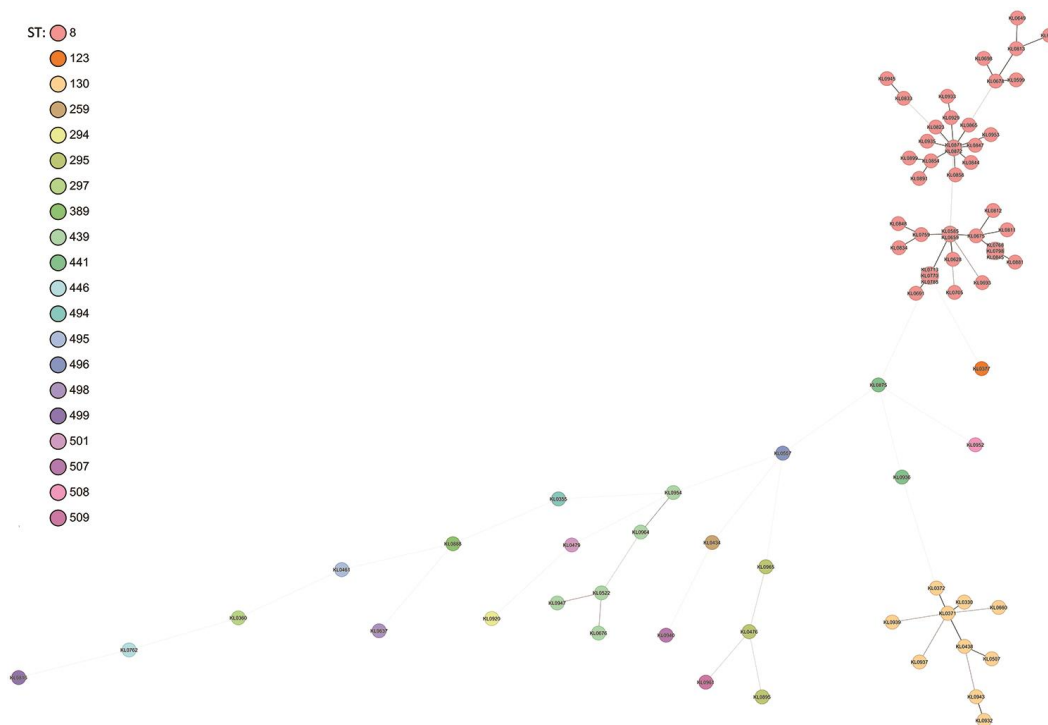

**Technical Appenedix Figure.** Minimum spanning tree of core-genome multilocus sequence typing with 1,553 targets of all 76 nontoxigenic *Corynebacterium diphtheriae* isolates submitted from northern Germany, April 2012–July 2017, and analyzed by next-generation sequencing and typed by 1,553 core-genome multilocus sequence targets. Samples cluster in sequence type–specific branches and are colored by sequence type affiliation.
